# Supplementary material for: Effect of pre-analytic variables on the reproducibility of qPCR relative telomere length measurement
Source: PLoS One. 2017 Sep 8;12(9):e0184098. doi: 10.1371/journal.pone.0184098 (PMC5590866; doi:10.1371/journal.pone.0184098)
Supplement: S1 Dataset — Dataset contains 384-well plate descriptor (A, B, C), Well Position, Sample ID, LightCycler instrument number, and standardized T/S Ratio for the experiment regarding well position and assay reproducibility. (XLSX) [file pone.0184098.s001.xlsx]

## Sheet: Sheet1
S1 Dataset. Well Position for Assay Reproducibility. Dataset contains 384-well plate descriptor (A, B, C), Well Position, Sample ID, LightCycler instrument number, and standardized T/S Ratio for the experiment regarding well position and assay reproducibility.
Telo/36B4 Plate Set	Well Position	Sample ID	LightCycler Instrument ID	Standardized T/S Ratio
A	A-01	NA07057	1	0.985453
A	B-01	NA07057	1	1.02509
A	C-01	NA07057	1	1.02515
A	D-01	NA07057	1	1.00874
A	E-01	NA07057	1	1.02922
A	F-01	NA07057	1	1.0206
A	G-01	NA07057	1	1.0322
A	H-01	NA07057	1	1.01809
A	A-02	NA07057	1	0.999059
A	B-02	NA07057	1	1.01253
A	C-02	NA07057	1	1.03247
A	D-02	NA07057	1	1.00654
A	E-02	NA07057	1	1.03043
A	F-02	NA07057	1	1.01732
A	G-02	NA07057	1	1.04082
A	H-02	NA07057	1	1.06467
A	A-03	NA07057	1	1.01841
A	B-03	NA07057	1	0.966918
A	C-03	NA07057	1	1.02039
A	D-03	NA07057	1	0.9979
A	E-03	NA07057	1	1.00198
A	F-03	NA07057	1	1.00866
A	G-03	NA07057	1	1.02088
A	H-03	NA07057	1	1.00602
A	A-04	NA07057	1	1.00892
A	B-04	NA07057	1	1.00802
A	C-04	NA07057	1	0.989967
A	D-04	NA07057	1	0.995834
A	E-04	NA07057	1	0.9734
A	F-04	NA07057	1	1.01928
A	G-04	NA07057	1	1.02626
A	H-04	NA07057	1	1.01873
A	A-05	NA07057	1	1.00914
A	B-05	NA07057	1	0.999554
A	C-05	NA07057	1	0.979456
A	D-05	NA07057	1	1.00258
A	E-05	NA07057	1	1.01461
A	F-05	NA07057	1	1.01705
A	G-05	NA07057	1	1.02603
A	H-05	NA07057	1	1.01546
A	A-06	NA07057	1	0.999824
A	B-06	NA07057	1	0.981909
A	C-06	NA07057	1	0.99487
A	D-06	NA07057	1	0.981607
A	E-06	NA07057	1	1.01197
A	F-06	NA07057	1	0.994525
A	G-06	NA07057	1	1.02495
A	H-06	NA07057	1	0.991947
A	A-07	NA07057	1	0.993221
A	B-07	NA07057	1	0.999339
A	C-07	NA07057	1	1.00258
A	D-07	NA07057	1	0.969585
A	E-07	NA07057	1	1.0264
A	F-07	NA07057	1	0.986127
A	G-07	NA07057	1	0.982267
A	H-07	NA07057	1	0.988184
A	A-08	NA07057	1	0.963111
A	B-08	NA07057	1	0.990211
A	C-08	NA07057	1	0.986209
A	D-08	NA07057	1	0.988778
A	E-08	NA07057	1	1.00382
A	F-08	NA07057	1	1.00064
A	G-08	NA07057	1	0.988935
A	H-08	NA07057	1	0.992618
A	A-09	NA07057	1	0.98014
A	B-09	NA07057	1	0.990007
A	C-09	NA07057	1	1.00854
A	D-09	NA07057	1	1.00729
A	E-09	NA07057	1	1.00832
A	F-09	NA07057	1	1.00285
A	G-09	NA07057	1	1.03023
A	H-09	NA07057	1	0.996443
A	A-10	NA07057	1	0.989667
A	B-10	NA07057	1	0.973022
A	C-10	NA07057	1	0.990418
A	D-10	NA07057	1	0.960365
A	E-10	NA07057	1	0.989606
A	F-10	NA07057	1	0.994388
A	G-10	NA07057	1	0.991989
A	H-10	NA07057	1	0.972
A	A-11	NA07057	1	1.00328
A	B-11	NA07057	1	0.981909
A	C-11	NA07057	1	0.985233
A	D-11	NA07057	1	0.990418
A	E-11	NA07057	1	0.986326
A	F-11	NA07057	1	0.980023
A	G-11	NA07057	1	0.996378
A	H-11	NA07057	1	0.972465
A	A-12	NA07057	1	0.967638
A	B-12	NA07057	1	0.962943
A	C-12	NA07057	1	0.978807
A	D-12	NA07057	1	0.995297
A	E-12	NA07057	1	0.976205
A	F-12	NA07057	1	1.01352
A	G-12	NA07057	1	0.99357
A	H-12	NA07057	1	0.993221
B	A-01	NA07057	1	1.00332
B	B-01	NA07057	1	1.02252
B	C-01	NA07057	1	1.01899
B	D-01	NA07057	1	1.01536
B	E-01	NA07057	1	1.01305
B	F-01	NA07057	1	1.03961
B	G-01	NA07057	1	1.04759
B	H-01	NA07057	1	1.01649
B	A-02	NA07057	1	1.00921
B	B-02	NA07057	1	1.00876
B	C-02	NA07057	1	1.03531
B	D-02	NA07057	1	1.01242
B	E-02	NA07057	1	1.01597
B	F-02	NA07057	1	1.03713
B	G-02	NA07057	1	1.02919
B	H-02	NA07057	1	1.02797
B	A-03	NA07057	1	0.975768
B	B-03	NA07057	1	1.02616
B	C-03	NA07057	1	1.02378
B	D-03	NA07057	1	1.03655
B	E-03	NA07057	1	1.01237
B	F-03	NA07057	1	1.01956
B	G-03	NA07057	1	1.03286
B	H-03	NA07057	1	1.02431
B	A-04	NA07057	1	0.998009
B	B-04	NA07057	1	1.00993
B	C-04	NA07057	1	1.01826
B	D-04	NA07057	1	0.989178
B	E-04	NA07057	1	1.01652
B	F-04	NA07057	1	1.04945
B	G-04	NA07057	1	1.03836
B	H-04	NA07057	1	1.01946
B	A-05	NA07057	1	0.992024
B	B-05	NA07057	1	0.976764
B	C-05	NA07057	1	0.972185
B	D-05	NA07057	1	0.991422
B	E-05	NA07057	1	1.03714
B	F-05	NA07057	1	1.09131
B	G-05	NA07057	1	1.04574
B	H-05	NA07057	1	1.06453
B	A-06	NA07057	1	0.963477
B	B-06	NA07057	1	1.044
B	C-06	NA07057	1	0.989617
B	D-06	NA07057	1	0.999246
B	E-06	NA07057	1	1.07213
B	F-06	NA07057	1	1.01099
B	G-06	NA07057	1	0.974284
B	H-06	NA07057	1	1.02369
B	A-07	NA07057	1	0.983117
B	B-07	NA07057	1	0.996043
B	C-07	NA07057	1	1.00259
B	D-07	NA07057	1	0.955418
B	E-07	NA07057	1	0.996103
B	F-07	NA07057	1	1.01517
B	G-07	NA07057	1	0.992577
B	H-07	NA07057	1	1.00083
B	A-08	NA07057	1	0.946408
B	B-08	NA07057	1	0.986088
B	C-08	NA07057	1	0.979723
B	D-08	NA07057	1	0.976764
B	E-08	NA07057	1	1.00089
B	F-08	NA07057	1	1.00142
B	G-08	NA07057	1	1.00154
B	H-08	NA07057	1	1.01158
B	A-09	NA07057	1	0.983665
B	B-09	NA07057	1	0.968681
B	C-09	NA07057	1	1.0104
B	D-09	NA07057	1	0.991929
B	E-09	NA07057	1	1.02548
B	F-09	NA07057	1	1.02306
B	G-09	NA07057	1	1.01582
B	H-09	NA07057	1	0.992531
B	A-10	NA07057	1	0.950354
B	B-10	NA07057	1	0.98086
B	C-10	NA07057	1	0.98317
B	D-10	NA07057	1	0.937272
B	E-10	NA07057	1	0.96316
B	F-10	NA07057	1	0.988465
B	G-10	NA07057	1	0.988519
B	H-10	NA07057	1	0.977929
B	A-11	NA07057	1	0.967004
B	B-11	NA07057	1	0.957356
B	C-11	NA07057	1	0.973344
B	D-11	NA07057	1	0.957231
B	E-11	NA07057	1	0.982518
B	F-11	NA07057	1	0.974407
B	G-11	NA07057	1	0.992489
B	H-11	NA07057	1	0.980151
B	A-12	NA07057	1	0.911764
B	B-12	NA07057	1	0.952543
B	C-12	NA07057	1	0.927784
B	D-12	NA07057	1	0.983742
B	E-12	NA07057	1	0.982152
B	F-12	NA07057	1	0.978589
B	G-12	NA07057	1	0.978589
B	H-12	NA07057	1	0.980831
C	A-01	NA07057	2	0.992976
C	B-01	NA07057	2	1.00162
C	C-01	NA07057	2	1.00609
C	D-01	NA07057	2	0.988925
C	E-01	NA07057	2	1.00634
C	F-01	NA07057	2	0.997513
C	G-01	NA07057	2	1.00207
C	H-01	NA07057	2	0.995024
C	A-02	NA07057	2	0.997603
C	B-02	NA07057	2	0.970123
C	C-02	NA07057	2	1.01364
C	D-02	NA07057	2	0.991208
C	E-02	NA07057	2	0.999216
C	F-02	NA07057	2	0.995452
C	G-02	NA07057	2	0.995024
C	H-02	NA07057	2	0.98292
C	A-03	NA07057	2	0.995555
C	B-03	NA07057	2	0.996488
C	C-03	NA07057	2	1.04252
C	D-03	NA07057	2	1.00488
C	E-03	NA07057	2	0.991613
C	F-03	NA07057	2	0.998275
C	G-03	NA07057	2	1.00913
C	H-03	NA07057	2	1.01364
C	A-04	NA07057	2	1.0039
C	B-04	NA07057	2	0.986683
C	C-04	NA07057	2	0.984167
C	D-04	NA07057	2	0.995797
C	E-04	NA07057	2	0.986012
C	F-04	NA07057	2	0.990775
C	G-04	NA07057	2	0.998274
C	H-04	NA07057	2	0.999141
C	A-05	NA07057	2	0.982604
C	B-05	NA07057	2	1.00147
C	C-05	NA07057	2	0.999476
C	D-05	NA07057	2	1.00965
C	E-05	NA07057	2	0.998103
C	F-05	NA07057	2	0.978181
C	G-05	NA07057	2	1.01181
C	H-05	NA07057	2	0.989913
C	A-06	NA07057	2	1.01002
C	B-06	NA07057	2	0.986254
C	C-06	NA07057	2	1.01899
C	D-06	NA07057	2	1.0005
C	E-06	NA07057	2	1.00801
C	F-06	NA07057	2	0.98073
C	G-06	NA07057	2	0.993829
C	H-06	NA07057	2	1.00965
C	A-07	NA07057	2	0.9854
C	B-07	NA07057	2	1.01394
C	C-07	NA07057	2	1.02866
C	D-07	NA07057	2	1.01414
C	E-07	NA07057	2	1.02085
C	F-07	NA07057	2	0.985777
C	G-07	NA07057	2	1.00325
C	H-07	NA07057	2	0.987868
C	A-08	NA07057	2	0.991888
C	B-08	NA07057	2	1.00895
C	C-08	NA07057	2	0.99289
C	D-08	NA07057	2	1.0252
C	E-08	NA07057	2	1.00679
C	F-08	NA07057	2	0.989751
C	G-08	NA07057	2	0.99315
C	H-08	NA07057	2	0.98744
C	A-09	NA07057	2	1.01188
C	B-09	NA07057	2	0.985581
C	C-09	NA07057	2	1.00885
C	D-09	NA07057	2	0.977746
C	E-09	NA07057	2	1.00965
C	F-09	NA07057	2	1.03051
C	G-09	NA07057	2	0.997589
C	H-09	NA07057	2	0.977115
C	A-10	NA07057	2	1.01445
C	B-10	NA07057	2	0.993063
C	C-10	NA07057	2	1.01106
C	D-10	NA07057	2	0.980597
C	E-10	NA07057	2	1.01519
C	F-10	NA07057	2	1.02251
C	G-10	NA07057	2	1.00213
C	H-10	NA07057	2	1.0082
C	A-11	NA07057	2	1.00441
C	B-11	NA07057	2	1.01436
C	C-11	NA07057	2	1.01456
C	D-11	NA07057	2	0.982361
C	E-11	NA07057	2	1.00283
C	F-11	NA07057	2	1.00213
C	G-11	NA07057	2	1.016
C	H-11	NA07057	2	0.985995
C	A-12	NA07057	2	1.00818
C	B-12	NA07057	2	0.972368
C	C-12	NA07057	2	1.00727
C	D-12	NA07057	2	0.989066
C	E-12	NA07057	2	1.00576
C	F-12	NA07057	2	1.03355
C	G-12	NA07057	2	1.01323
C	H-12	NA07057	2	1.02929
D	A-01	NA07057	2	0.969611
D	B-01	NA07057	2	1.00945
D	C-01	NA07057	2	1.02602
D	D-01	NA07057	2	0.996245
D	E-01	NA07057	2	0.98924
D	F-01	NA07057	2	1.00348
D	G-01	NA07057	2	0.994587
D	H-01	NA07057	2	1.01145
D	A-02	NA07057	2	0.983253
D	B-02	NA07057	2	0.9936
D	C-02	NA07057	2	1.0211
D	D-02	NA07057	2	0.999317
D	E-02	NA07057	2	1.00649
D	F-02	NA07057	2	1.01008
D	G-02	NA07057	2	0.991932
D	H-02	NA07057	2	0.904854
D	A-03	NA07057	2	0.984027
D	B-03	NA07057	2	0.986132
D	C-03	NA07057	2	1.0035
D	D-03	NA07057	2	0.971047
D	E-03	NA07057	2	1.02237
D	F-03	NA07057	2	1.02412
D	G-03	NA07057	2	1.01947
D	H-03	NA07057	2	1.00435
D	A-04	NA07057	2	0.973929
D	B-04	NA07057	2	1.00188
D	C-04	NA07057	2	0.980406
D	D-04	NA07057	2	1.00439
D	E-04	NA07057	2	1.02568
D	F-04	NA07057	2	1.00971
D	G-04	NA07057	2	1.01108
D	H-04	NA07057	2	1.00497
D	A-05	NA07057	2	1.01817
D	B-05	NA07057	2	1.01898
D	C-05	NA07057	2	0.982805
D	D-05	NA07057	2	1.00871
D	E-05	NA07057	2	1.02684
D	F-05	NA07057	2	0.999277
D	G-05	NA07057	2	0.990063
D	H-05	NA07057	2	0.989805
D	A-06	NA07057	2	0.975895
D	B-06	NA07057	2	0.999764
D	C-06	NA07057	2	1.0277
D	D-06	NA07057	2	0.98147
D	E-06	NA07057	2	1.0624
D	F-06	NA07057	2	1.01733
D	G-06	NA07057	2	0.988977
D	H-06	NA07057	2	0.987273
D	A-07	NA07057	2	0.949359
D	B-07	NA07057	2	1.01145
D	C-07	NA07057	2	0.996346
D	D-07	NA07057	2	0.991774
D	E-07	NA07057	2	1.03469
D	F-07	NA07057	2	1.00746
D	G-07	NA07057	2	0.990946
D	H-07	NA07057	2	0.9674
D	A-08	NA07057	2	0.979755
D	B-08	NA07057	2	1.00971
D	C-08	NA07057	2	1.00262
D	D-08	NA07057	2	0.978461
D	E-08	NA07057	2	1.00064
D	F-08	NA07057	2	0.97623
D	G-08	NA07057	2	1.01758
D	H-08	NA07057	2	0.947723
D	A-09	NA07057	2	0.997664
D	B-09	NA07057	2	1.0076
D	C-09	NA07057	2	0.999899
D	D-09	NA07057	2	1.01646
D	E-09	NA07057	2	1.00461
D	F-09	NA07057	2	1.00126
D	G-09	NA07057	2	1.00151
D	H-09	NA07057	2	0.985151
D	A-10	NA07057	2	1.00462
D	B-10	NA07057	2	1.02189
D	C-10	NA07057	2	1.00783
D	D-10	NA07057	2	0.992138
D	E-10	NA07057	2	1.0142
D	F-10	NA07057	2	1.00101
D	G-10	NA07057	2	1.03828
D	H-10	NA07057	2	1.03349
D	A-11	NA07057	2	0.984642
D	B-11	NA07057	2	1.02286
D	C-11	NA07057	2	1.01182
D	D-11	NA07057	2	0.994954
D	E-11	NA07057	2	0.988256
D	F-11	NA07057	2	0.97509
D	G-11	NA07057	2	1.01157
D	H-11	NA07057	2	0.982369
D	A-12	NA07057	2	0.977745
D	B-12	NA07057	2	0.975256
D	C-12	NA07057	2	1.001
D	D-12	NA07057	2	1.01387
D	E-12	NA07057	2	1.01457
D	F-12	NA07057	2	1.01445
D	G-12	NA07057	2	1.01497
D	H-12	NA07057	2	1.01359
E	A-01	NA07057	3	0.996633
E	B-01	NA07057	3	1.01903
E	C-01	NA07057	3	1.02847
E	D-01	NA07057	3	1.00583
E	E-01	NA07057	3	1.04283
E	F-01	NA07057	3	1.01855
E	G-01	NA07057	3	1.00626
E	H-01	NA07057	3	0.988876
E	A-02	NA07057	3	0.974137
E	B-02	NA07057	3	1.0233
E	C-02	NA07057	3	1.01116
E	D-02	NA07057	3	1.00786
E	E-02	NA07057	3	1.0361
E	F-02	NA07057	3	1.0202
E	G-02	NA07057	3	1.01038
E	H-02	NA07057	3	0.967034
E	A-03	NA07057	3	0.984528
E	B-03	NA07057	3	1.01659
E	C-03	NA07057	3	1.03827
E	D-03	NA07057	3	1.01605
E	E-03	NA07057	3	1.00384
E	F-03	NA07057	3	1.02734
E	G-03	NA07057	3	1.01617
E	H-03	NA07057	3	0.996527
E	A-04	NA07057	3	0.986887
E	B-04	NA07057	3	1.00065
E	C-04	NA07057	3	1.00138
E	D-04	NA07057	3	0.99286
E	E-04	NA07057	3	1.00751
E	F-04	NA07057	3	0.993699
E	G-04	NA07057	3	1.01611
E	H-04	NA07057	3	1.00308
E	A-05	NA07057	3	0.9982
E	B-05	NA07057	3	1.00589
E	C-05	NA07057	3	1.01367
E	D-05	NA07057	3	1.01406
E	E-05	NA07057	3	1.01825
E	F-05	NA07057	3	0.986069
E	G-05	NA07057	3	0.990465
E	H-05	NA07057	3	0.991285
E	A-06	NA07057	3	0.989308
E	B-06	NA07057	3	0.998168
E	C-06	NA07057	3	1.00264
E	D-06	NA07057	3	0.986062
E	E-06	NA07057	3	1.03046
E	F-06	NA07057	3	1.00465
E	G-06	NA07057	3	1.01163
E	H-06	NA07057	3	1.02155
E	A-07	NA07057	3	0.976122
E	B-07	NA07057	3	0.99496
E	C-07	NA07057	3	1.02232
E	D-07	NA07057	3	0.984486
E	E-07	NA07057	3	1.00517
E	F-07	NA07057	3	1.00176
E	G-07	NA07057	3	1.00182
E	H-07	NA07057	3	0.986526
E	A-08	NA07057	3	0.950264
E	B-08	NA07057	3	0.996488
E	C-08	NA07057	3	0.981295
E	D-08	NA07057	3	0.998542
E	E-08	NA07057	3	0.992491
E	F-08	NA07057	3	0.980479
E	G-08	NA07057	3	0.99692
E	H-08	NA07057	3	0.984902
E	A-09	NA07057	3	0.968215
E	B-09	NA07057	3	0.985265
E	C-09	NA07057	3	1.00384
E	D-09	NA07057	3	1.01077
E	E-09	NA07057	3	0.999726
E	F-09	NA07057	3	0.98247
E	G-09	NA07057	3	1.00712
E	H-09	NA07057	3	0.981723
E	A-10	NA07057	3	0.968218
E	B-10	NA07057	3	1.00465
E	C-10	NA07057	3	0.988876
E	D-10	NA07057	3	1.0188
E	E-10	NA07057	3	0.99771
E	F-10	NA07057	3	0.978493
E	G-10	NA07057	3	0.979289
E	H-10	NA07057	3	1.0055
E	A-11	NA07057	3	0.964284
E	B-11	NA07057	3	0.980081
E	C-11	NA07057	3	1.01205
E	D-11	NA07057	3	1.0543
E	E-11	NA07057	3	0.99377
E	F-11	NA07057	3	1.00748
E	G-11	NA07057	3	1.02364
E	H-11	NA07057	3	0.967039
E	A-12	NA07057	3	0.938271
E	B-12	NA07057	3	0.962766
E	C-12	NA07057	3	0.985294
E	D-12	NA07057	3	0.986953
E	E-12	NA07057	3	1.01734
E	F-12	NA07057	3	1.03905
E	G-12	NA07057	3	1.03268
E	H-12	NA07057	3	0.979292
F	A-01	NA07057	3	0.997241
F	B-01	NA07057	3	1.01975
F	C-01	NA07057	3	1.02046
F	D-01	NA07057	3	1.01176
F	E-01	NA07057	3	1.02215
F	F-01	NA07057	3	0.982517
F	G-01	NA07057	3	0.993904
F	H-01	NA07057	3	1.01096
F	A-02	NA07057	3	1.00124
F	B-02	NA07057	3	1.01432
F	C-02	NA07057	3	1.01642
F	D-02	NA07057	3	1.00469
F	E-02	NA07057	3	1.01274
F	F-02	NA07057	3	1.01571
F	G-02	NA07057	3	1.00528
F	H-02	NA07057	3	0.989042
F	A-03	NA07057	3	0.971566
F	B-03	NA07057	3	1.01063
F	C-03	NA07057	3	1.02284
F	D-03	NA07057	3	0.997436
F	E-03	NA07057	3	1.02044
F	F-03	NA07057	3	1.00567
F	G-03	NA07057	3	1.02419
F	H-03	NA07057	3	1.05539
F	A-04	NA07057	3	0.978492
F	B-04	NA07057	3	0.994938
F	C-04	NA07057	3	1.02829
F	D-04	NA07057	3	1.00668
F	E-04	NA07057	3	1.00534
F	F-04	NA07057	3	1.011
F	G-04	NA07057	3	0.998674
F	H-04	NA07057	3	0.987643
F	A-05	NA07057	3	0.986324
F	B-05	NA07057	3	0.977455
F	C-05	NA07057	3	0.996703
F	D-05	NA07057	3	0.994372
F	E-05	NA07057	3	1.02725
F	F-05	NA07057	3	0.998313
F	G-05	NA07057	3	0.992046
F	H-05	NA07057	3	0.984775
F	A-06	NA07057	3	0.977455
F	B-06	NA07057	3	1.00059
F	C-06	NA07057	3	0.984369
F	D-06	NA07057	3	0.968025
F	E-06	NA07057	3	1.06112
F	F-06	NA07057	3	1.0341
F	G-06	NA07057	3	0.983254
F	H-06	NA07057	3	0.979274
F	A-07	NA07057	3	0.957659
F	B-07	NA07057	3	0.996018
F	C-07	NA07057	3	1.01198
F	D-07	NA07057	3	0.97854
F	E-07	NA07057	3	1.00995
F	F-07	NA07057	3	0.990681
F	G-07	NA07057	3	0.994052
F	H-07	NA07057	3	0.946435
F	A-08	NA07057	3	0.966788
F	B-08	NA07057	3	0.989191
F	C-08	NA07057	3	1.01032
F	D-08	NA07057	3	1.00599
F	E-08	NA07057	3	0.993049
F	F-08	NA07057	3	1.00668
F	G-08	NA07057	3	1.10005
F	H-08	NA07057	3	0.9798
F	A-09	NA07057	3	0.980749
F	B-09	NA07057	3	1.00166
F	C-09	NA07057	3	1.00806
F	D-09	NA07057	3	1.02998
F	E-09	NA07057	3	1.00037
F	F-09	NA07057	3	0.979955
F	G-09	NA07057	3	0.989087
F	H-09	NA07057	3	0.971974
F	A-10	NA07057	3	0.989576
F	B-10	NA07057	3	1.00558
F	C-10	NA07057	3	1.02145
F	D-10	NA07057	3	0.998602
F	E-10	NA07057	3	0.979644
F	F-10	NA07057	3	1.00865
F	G-10	NA07057	3	1.00005
F	H-10	NA07057	3	1.00689
F	A-11	NA07057	3	0.975931
F	B-11	NA07057	3	0.996382
F	C-11	NA07057	3	1.0043
F	D-11	NA07057	3	1.06611
F	E-11	NA07057	3	0.997345
F	F-11	NA07057	3	0.973444
F	G-11	NA07057	3	1.01133
F	H-11	NA07057	3	0.978854
F	A-12	NA07057	3	0.956194
F	B-12	NA07057	3	0.965553
F	C-12	NA07057	3	0.990963
F	D-12	NA07057	3	0.979716
F	E-12	NA07057	3	1.00101
F	F-12	NA07057	3	1.00332
F	G-12	NA07057	3	1.01169
F	H-12	NA07057	3	0.995557
